# Supplementary material for: The dynamic therapeutic effect of a targeted photothermal nanovaccine incorporating toll-like receptor 7 agonist enhanced cancer immunotherapy
Source: Royal Society of Chemistry journal article supplement (doi:10.1039/d3tb01345f), 2023-01-01
Supplement: d3tb01345f1.pdf [file d3tb01345f1.pdf]

**Dynamic Therapeutic Effect of Targeted Photothermal Nanovaccine Incorporating  
Toll-like Receptor 7 Agonist Enhanced Cancer Immunotherapy**

**Laxmanan Karthikeyan<sup>a</sup>, Babu Rithisa<sup>b</sup> & Raju Vivek<sup>a\*</sup>**

*<sup>a</sup>Bio-Nano Theranostics Research Laboratory, Cancer Research Program (CRP), School of  
Life Sciences, Bharathiar University, Coimbatore-641 046, TN, India.*

*<sup>b</sup>Department of Chemistry, Dr. N.G.P. Arts and Science College, Coimbatore, Tamil Nadu –  
641048.TN, India.*

**Corresponding Author\***

**Dr. R. Vivek**

*Assistant Professor*

*Bio-Nano Theranostics Research Laboratory*

*Cancer Research Program*

*School of Life Sciences*

*Bharathiar University*

*Coimbatore-641 046, TN, India.*

*Email: [vivekr@buc.edu.in](mailto:vivekr@buc.edu.in)*

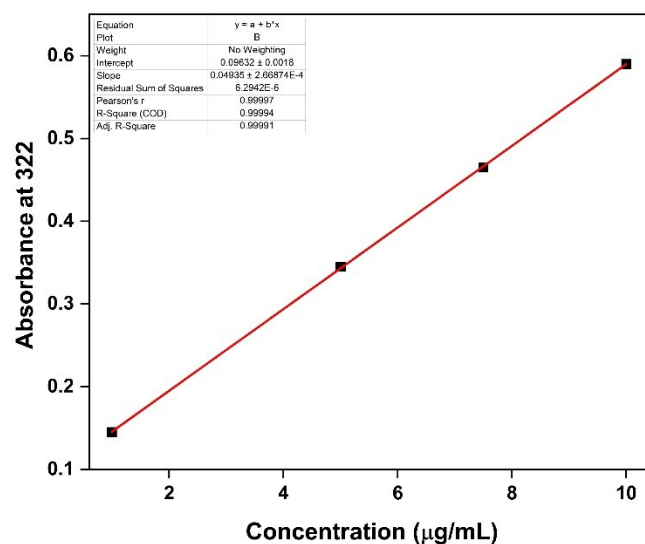

**Fig. S1** The regression equation is determined by the absorbance at 322 nm versus concentration of R837.

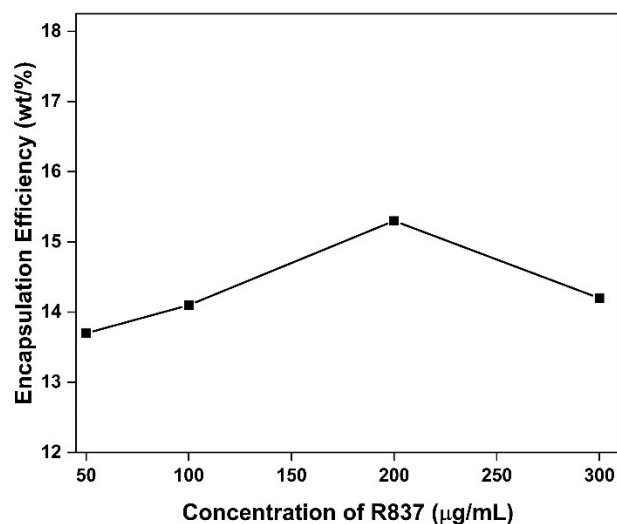

**Fig. S2** The encapsulation efficiency R837 by CA-PANi NPs at different concentration.

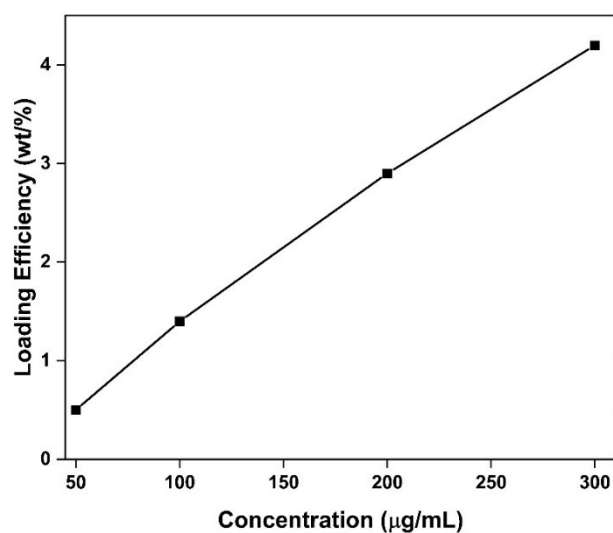

**Fig. S3** The loading efficiency of R837 by CA-PANi NPs at different concentration.

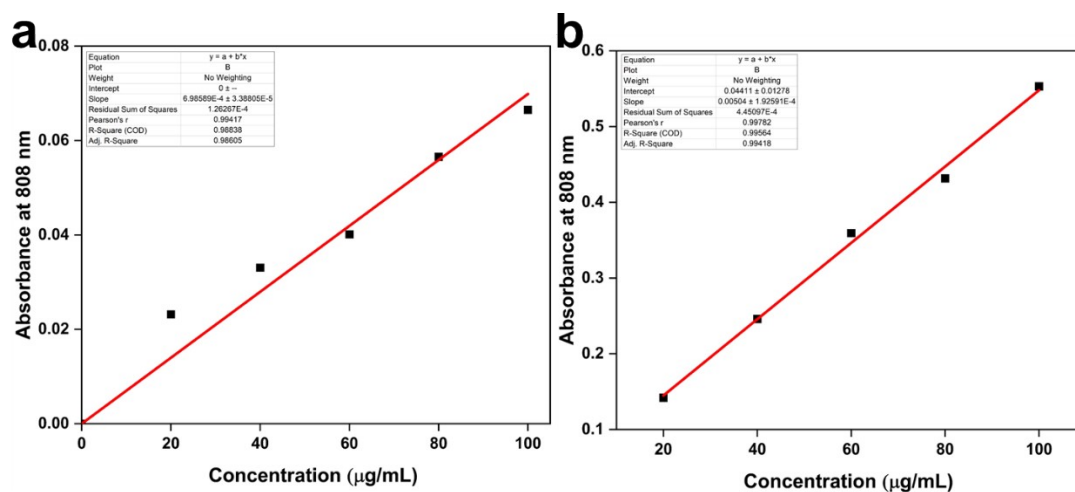

**Fig. S4** The regression equation is determined by the absorbance at 808 nm different concentration of (a) CA-PANi and (b) CPRR.

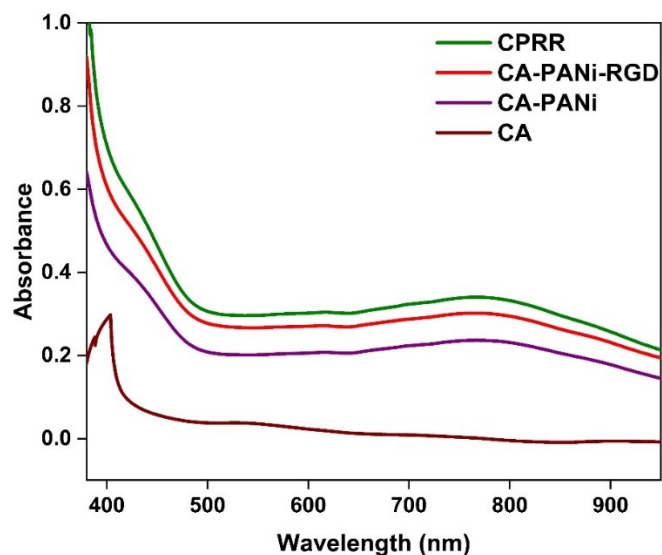

**Fig. S5** UV-Vis-NIR spectrum of components of CPRR.

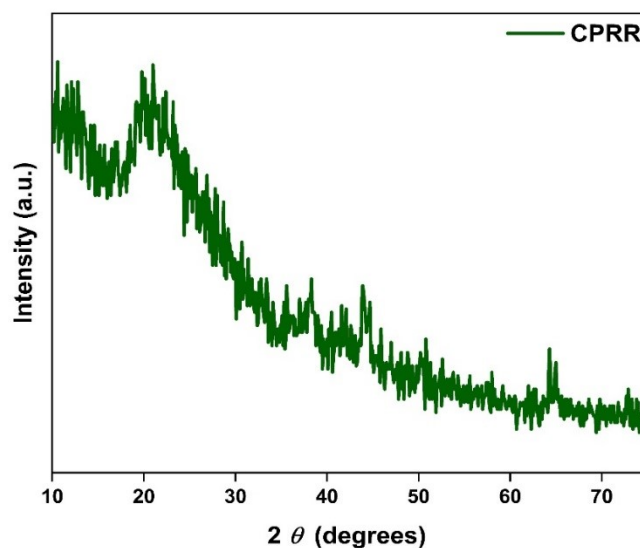

**Fig. S6** XRD spectra of CPRR.

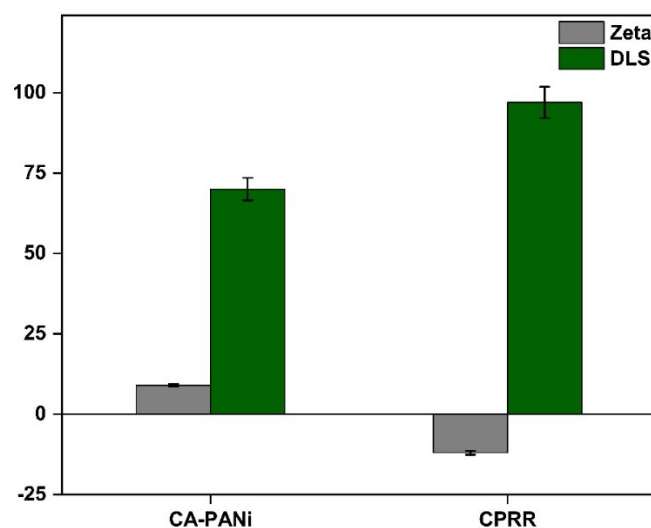

**Fig. S7** Zeta and DLS of CA-PANi and CPRR.

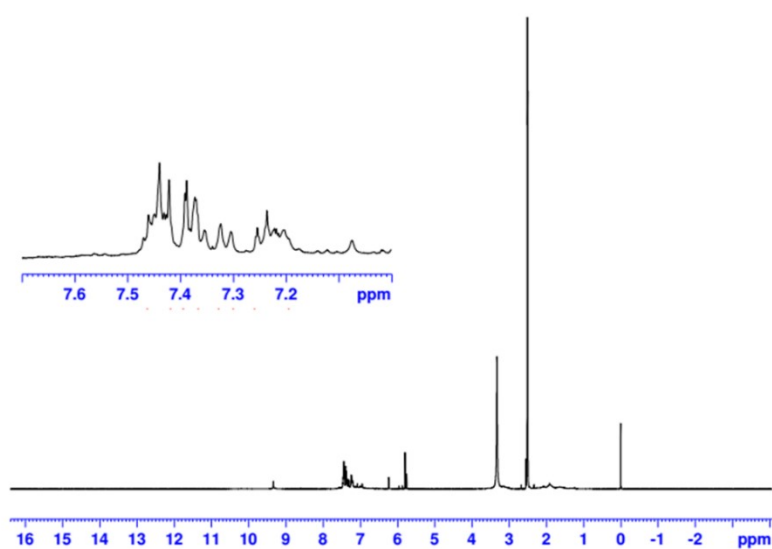

**Fig. S8**  $^1\text{H}$ -nuclear magnetic resonance (NMR) spectrum of PANi.

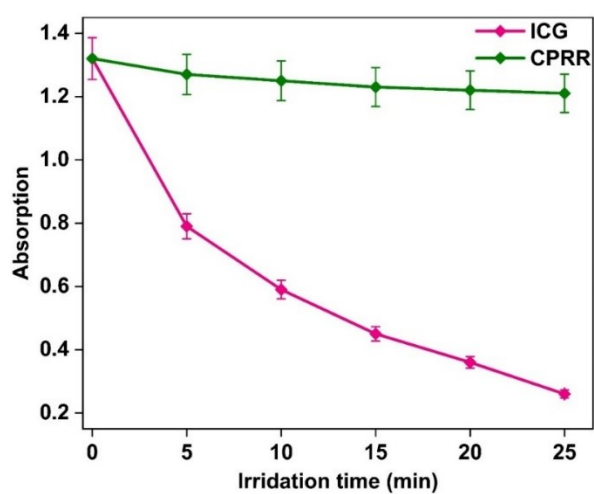

**Fig. S9** CPRR photostability compared with ICG.

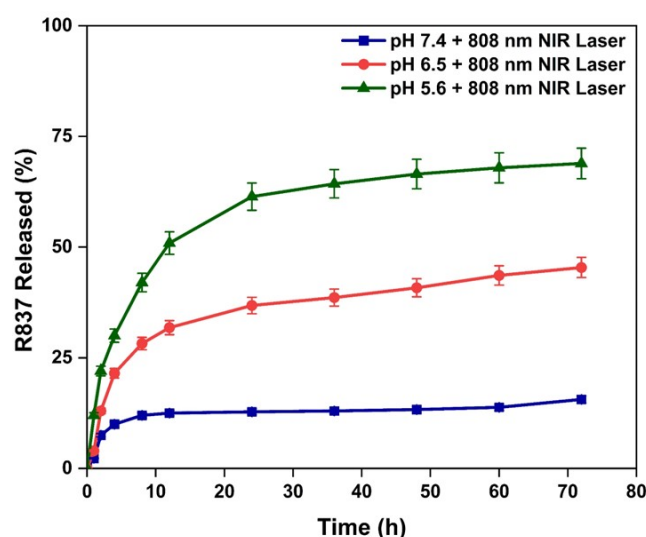

**Fig. S10** Cumulative release curves of R837 at different pH under 808 nm laser irradiation.

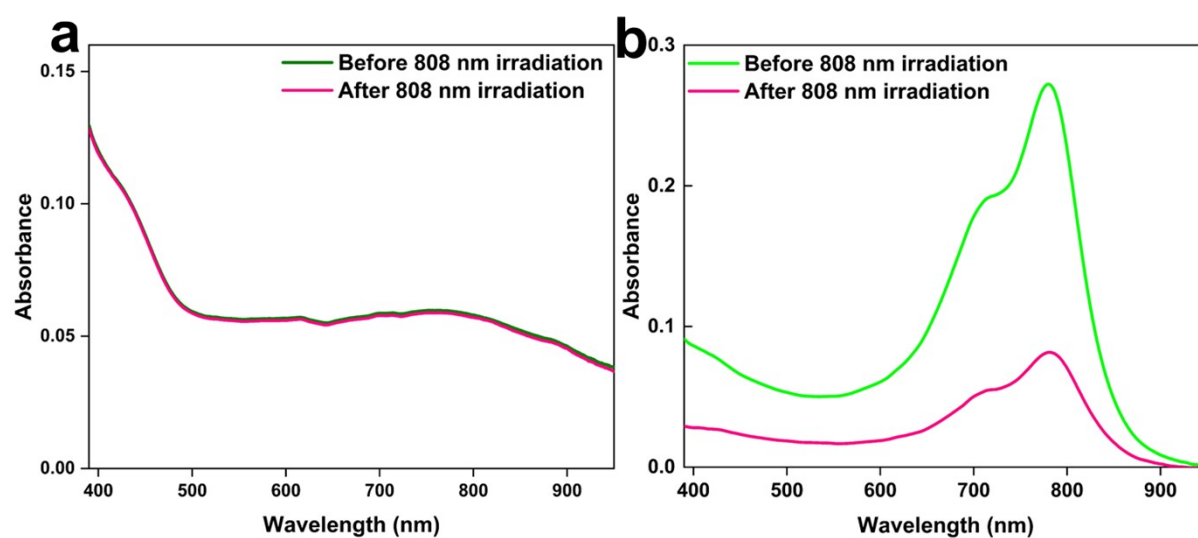

**Fig. S11** UV-vis-NIR absorbance spectra of CPRR aqueous dispersions before and after, a) 808nm and b) UV-Vis-NIR absorbance spectra of free ICG before and after an 808 nm laser irradiation for 5 min.

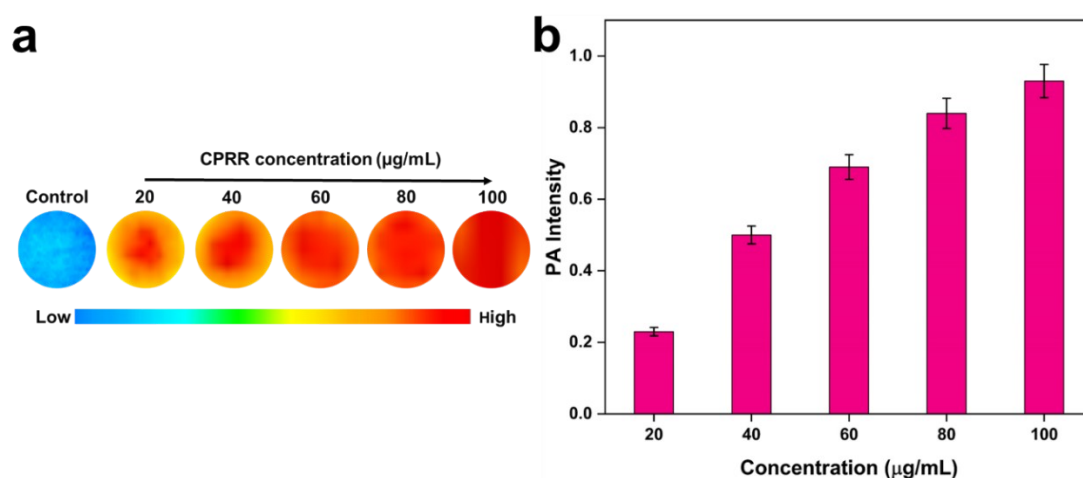

**Fig. S12** PA images (Inset) corresponding PA signal intensity of CPRR solutions with different concentrations.

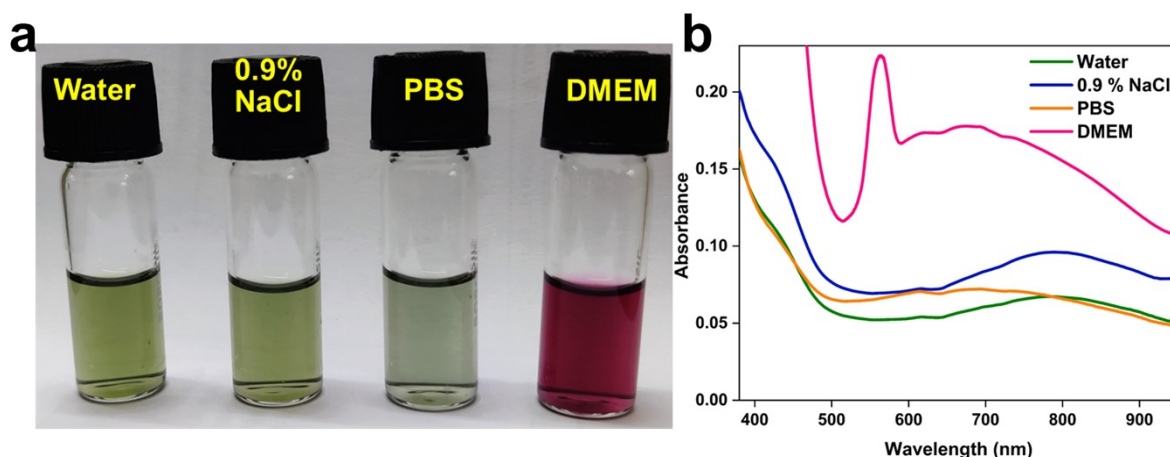

**Fig. S13** a) Stability of NC dispersion in Water, 0.9% NaCl, PBS, and DMEM, b) UV-vis-NIR absorbance spectra CPRR in Water, 0.9% NaCl, PBS, and DMEM.

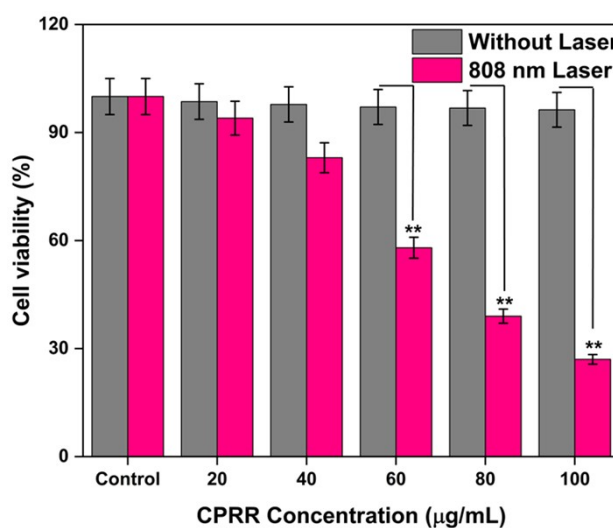

**Fig. S14** Relative cell viabilities of NIH3T3 cells with various concentrations (20, 40, 60, 80, and 100 µg/mL). CPRR for 24 h and exposed with and without NIR laser irradiation power density 1 W/cm<sup>2</sup>.

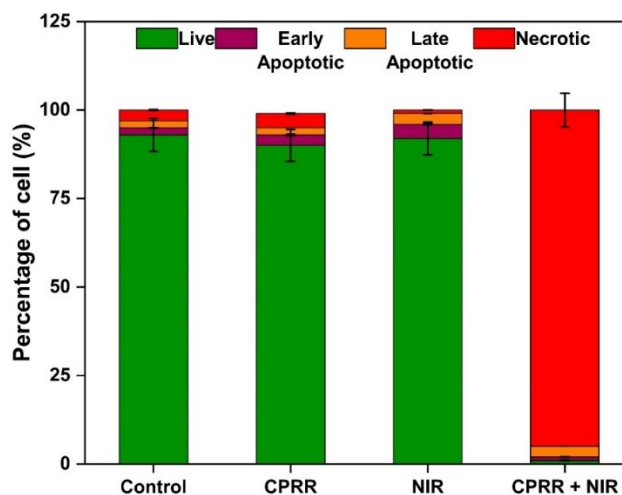

**Fig. S15** The quantitative apoptosis analysis of HeLa cells after various treatments co-stained with Annexin V-FITC/PI.
